# Supplementary material for: Integrity Protection for Data Aggregation in Smart Grid
Source: Hindawi journal article supplement (doi:10.1155/2022/2734487), 2022-10-22
Supplement: f1 [file 2734487.f1.docx]

As an example, we prove the integrity of the construction based on the Lagrange interpolation function, and the construction based on the Chinese Remainder Theorem can be proven in a similar way. Thus, omitted.

For the integrity analysis, our analysis includes three parts, namely the security assumption part, the adversary model part and the security proof part. The security assumption part describes a hard problem that cannot be efficiently solved. The adversary model part describes the adversary's actions. The security proof part proves that this adversary is not able to establish an efficient attack on DASG. Otherwise, we can construct an efficient algorithm, which can solve the problem defined in the security assumption part. Therefore, this adversary doesn't exist, and the newly designed protocol is secure.

**Part 1) Security Assumption**

Hard problems on:

(i) Computational Diffie-Hellman problem (CDH). Given randomly distributed unknown , this problem is to compute from , , and .

(ii) Decisional Diffie-Hellman problem (DDH). Given randomly distributed unknown x, this problem is to check whether from , , , and .

(iii) Gap Diffie-Hellman group (GDH). If one can solve the DDH problem efficiently, but he cannot solve the CDH problem in probabilistic polynomial time, we say is a GDH group. For bilinear pairing, one can solve the DDH problem by verifying . This is because .

Security assumption of DASG:

In DASG, we assume is a GDH group as described below. Given , and , there is no -time algorithm, that can compute from randomly distributed unknown with the non-negligible probability .

**Part 2) adversary model**

For integrity protection, it must be ensured that the adversary cannot forge messages sent by the th smart meter. Therefore, this potential adversary is any malicious network node that can tamper the transmitted message. This adversary can communicate with a challenger as follows.

1. Key-generating. acts as the gateway. It holds ( ,) and gives to , but is unknown to .
2. Hash query. sends a list of hash queries (i.e. ) to C, and the latter returns the Hash values (i.e. ).
3. Signing query. sends a list of signing queries (i.e., ) to , and returns the corresponding signature ().
4. Forgery. generates a forged message-signature pair (,), where the query for has never been sent.

If the *Verify* algorithm returns *True* for (,), We say wins the game.

**Part 3) security proof**

We will show cannot efficiently forge in this part. Otherwise, will be able to solve the GDH problem using this adversary, which is shown in Theorem 1.

**Theorem 1**. After signing queries, if the adversary can forge (,) with the probability in time , can solve the GDH problem with the probability in time , where is the time cost of modular exponentiation.

**Proof**. Assuming can forge (,) with the probability in time , we can construct an algorithm which can solve the GDH problem in time with the probability .

Given (, , ) for randomly distributed unknown (, ), can compute as follows:

Key-generating. acts as the gateway. It holds ( ,) and gives to , but is unknown to .

Hash query. C maintains a set of tuples (i.e. ()) for responding to hash queries, which is managed as follows:

1. At the beginning, is empty.
2. When a hash query for is issued by , responds as follows. First, if the query (e.g. ) already appears in , responds with . Second, if the query for is not in , randomly generates a coin according to the bivariate probability distribution . Third, generates a random element . If , computes . Otherwise, computes . Fourth, adds the query (i.e. ()) to and responds to .

Signing query. responds to the signing query for as follows. First, issues the hash query for to obtain , and () is the corresponding tuple in . Second, if , aborts. Otherwise, gives to .

Forgery. generates a forged message-signature pair (, ), where the query for has never been sent.

Solving the GDH problem. can solve the GDH problem as follows. First, runs to get (,), in which the query for has never been sent. Second, sends a hash query for to get the tuple . If , aborts. Otherwise, it gets . Third, from the algorithm, gets . Since and

, we get .

Since and , we further get . That is to say, . Taking into this equation, we get . Finally, we get .

Probability for solving the GDH problem. From the above simulation process, we can compute the probability for solving the GDH problem as follows. First, needs to successfully respond to signing queries from . This probability is . Second, runs to get the forged (, ). According to the assumption of Theorem 1, this probability of success is . Third, sends a hash query for to get the tuple . The probability of is . Finally, the total probability is a multiplication of the above three probabilities: .

Time for solving the GDH problem. From the above simulation process, we can compute the time for solving the GDH problem as follows. First, needs to successfully respond to signing queries from . The time is . Second, runs to get the forged (, ). According to the assumption of Theorem 1, this time is . Third, sends a hash query for to get the tuple . The time is . Finally, the total time can be computed as .
